# Supplementary material for: Formation and operating mechanisms of single-crystalline perovskite NaNbO3 nanocubes/few-layered Nb2CTx MXene hybrids towards Li-ion capacitors
Source: Royal Society of Chemistry journal article supplement (doi:10.1039/d1ta03684j), 2021-01-01
Supplement: d1ta03684j1.pdf [file d1ta03684j1.pdf]

## Electronic Supplementary Information (ESI)

### Formation and Operating Mechanisms of Single-Crystalline Perovskite $\text{NaNbO}_3$

#### Nanocubes/Few-Layered $\text{Nb}_2\text{CT}_x$ MXene Hybrids towards Li-Ion Capacitors

*Li Qin,<sup>†</sup> Yang Liu,<sup>†</sup> Shuhao Zhu, Dongxu Wu, Guangyuan Wang, Jinyang Zhang,  
Yuyan Wang, Linrui Hou\*, Changzhou Yuan\**

School of Materials Science & Engineering, University of Jinan, Jinan, 250022, P. R.  
China

E-mail: mse\_houlr@ujn.edu.cn (*Prof. L. R. Hou*)

mse\_yuancz@ujn.edu.cn; ayuancz@163.com (*Prof. C. Z. Yuan*)

<sup>†</sup>Theses authors contributed equally to this work.

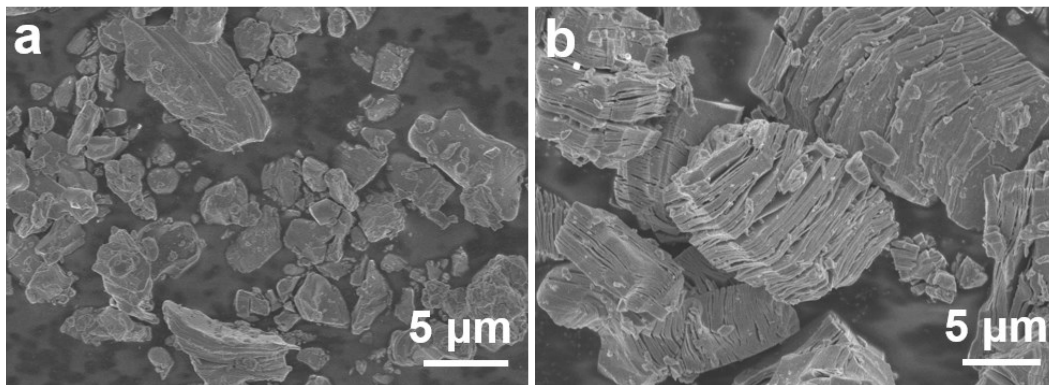

**Fig. S1.** FESEM images of (a) Nb<sub>2</sub>AlC MAX and (b) m-Nb<sub>2</sub>CT<sub>x</sub> MXene.

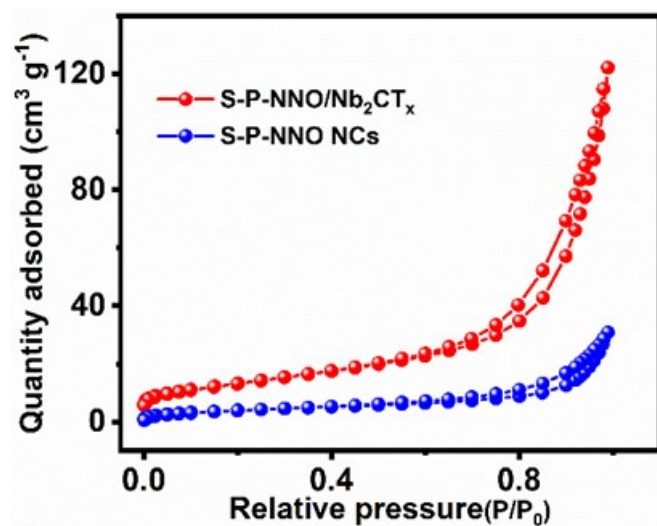

**Fig. S2.** Nitrogen adsorption/desorption isotherms of S-P-NNO NCs and S-P-NNO/f-Nb<sub>2</sub>CT<sub>x</sub> hybrid as indicated.

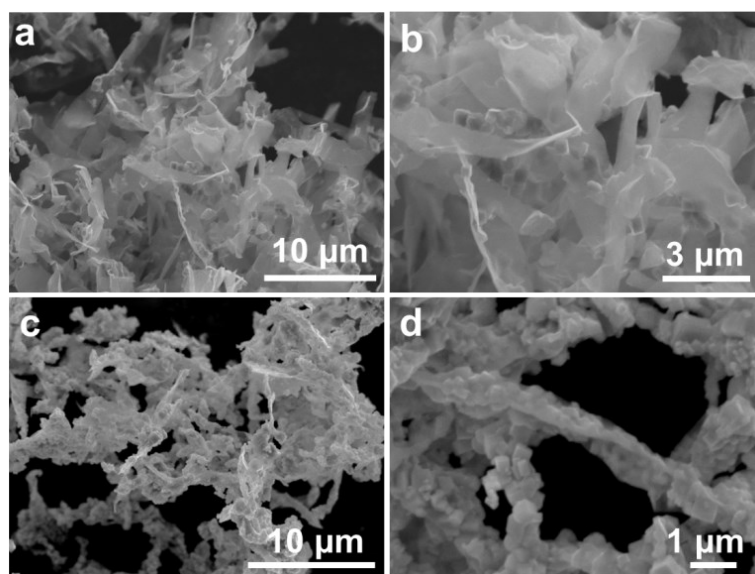

**Fig. S3.** SEM images of the S-P-NNO NCs and f-Nb<sub>2</sub>CT<sub>x</sub> NSs after freeze-drying with different mass ratios: (a, b) 1 : 1; (c, d) 3 : 1.

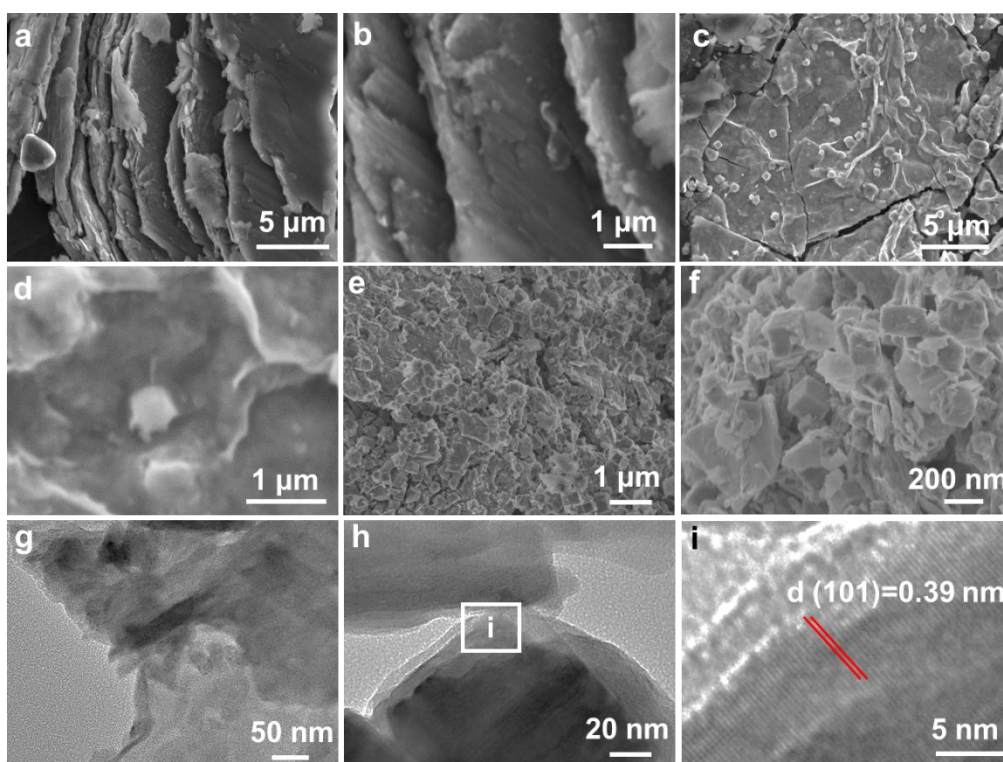

**Fig. S4.** SEM images of (a, b) f-1M-0.5h and (c, d) f-1M-1h; (e, f) SEM, (g, h) TEM and (i) HRTEM images of f-1M-2h.

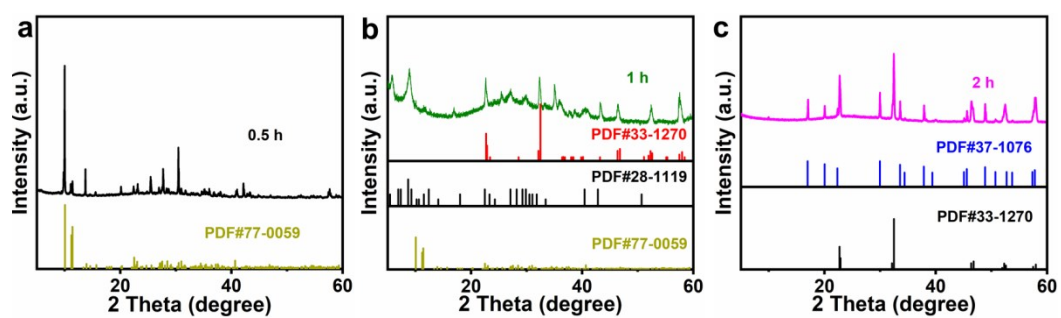

**Fig. S5.** XRD patterns of (a) f-1M-0.5h, (b) f-1M-1h, and (c) f-1M-2h.

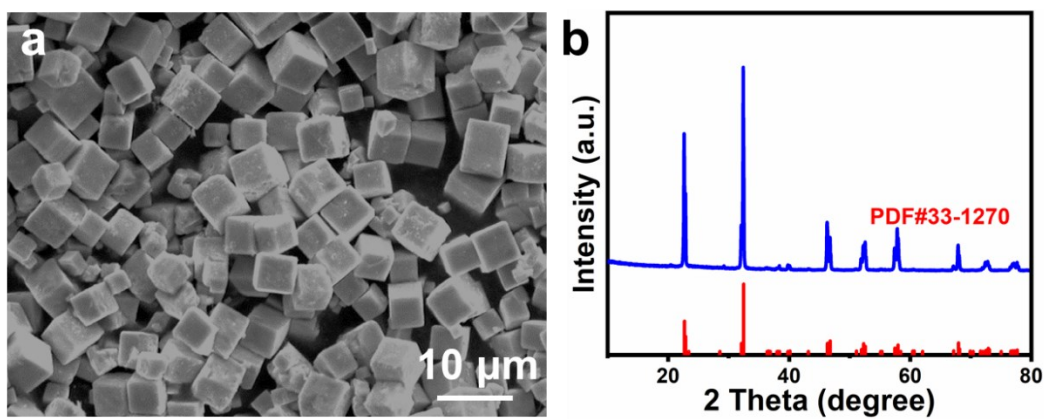

**Fig. S6.** (a) SEM image and (b) XRD pattern of f-1M-12h.

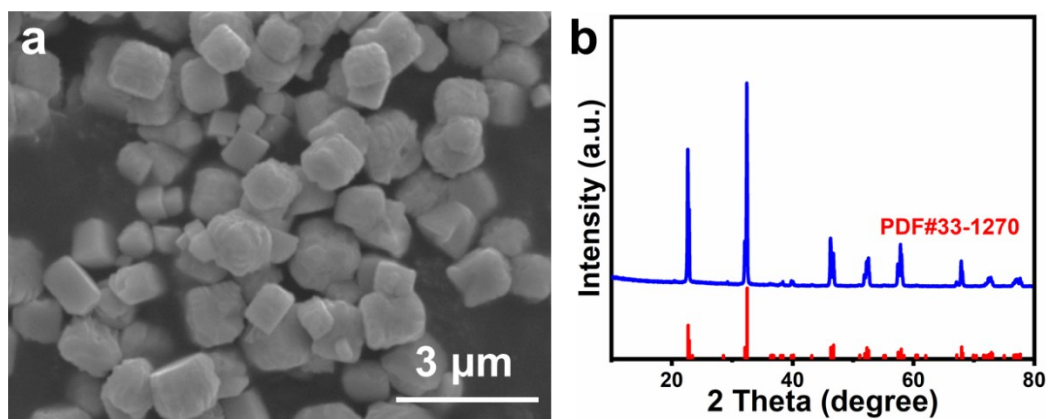

**Fig. S7.** (a) SEM image and (b) XRD pattern of the f-3M-3h.



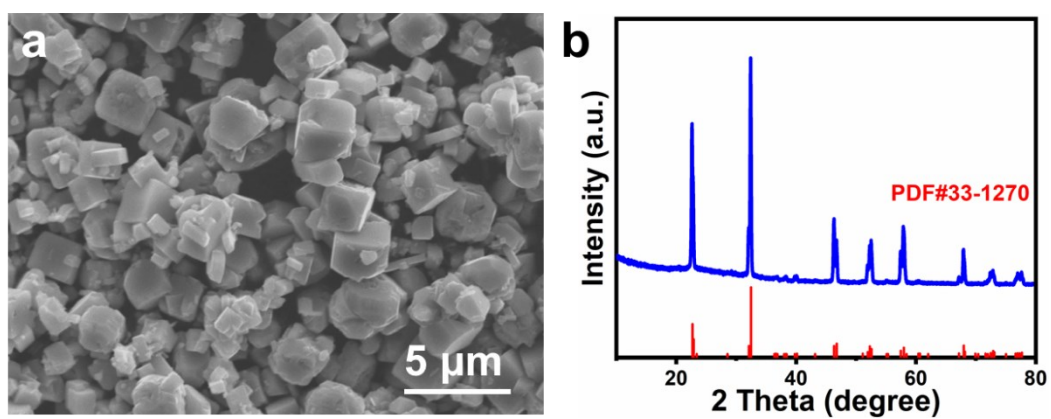

**Fig. S8.** (a) SEM image and (b) XRD pattern of the m-1M-3h.

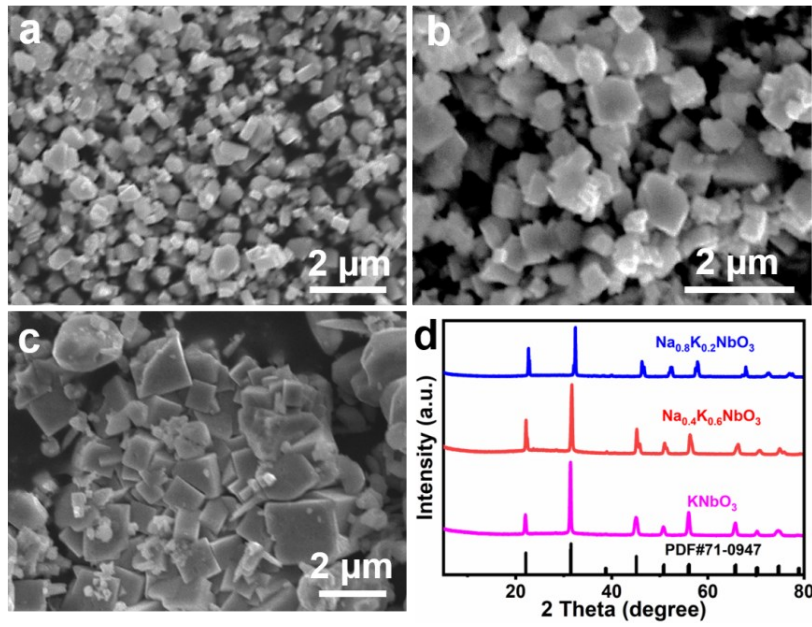

**Fig. S9.** SEM images of (a) KNbO<sub>3</sub>, (b) Na<sub>0.4</sub>K<sub>0.6</sub>NbO<sub>3</sub> and (c) Na<sub>0.8</sub>K<sub>0.2</sub>NbO<sub>3</sub>, respectively, and XRD patterns of the three as indicated.

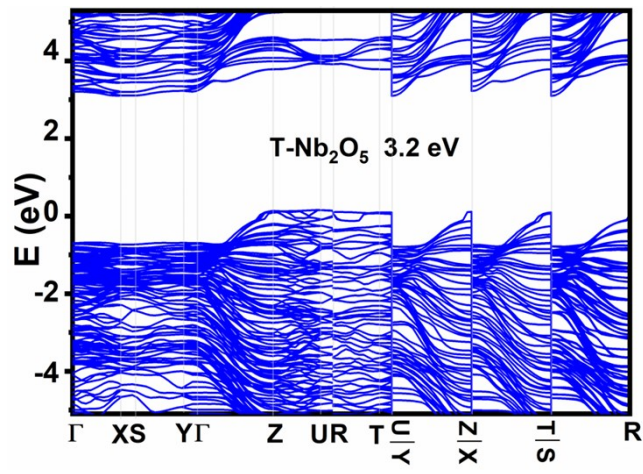

**Fig. S10.** Band structure of the T-Nb<sub>2</sub>O<sub>5</sub>.

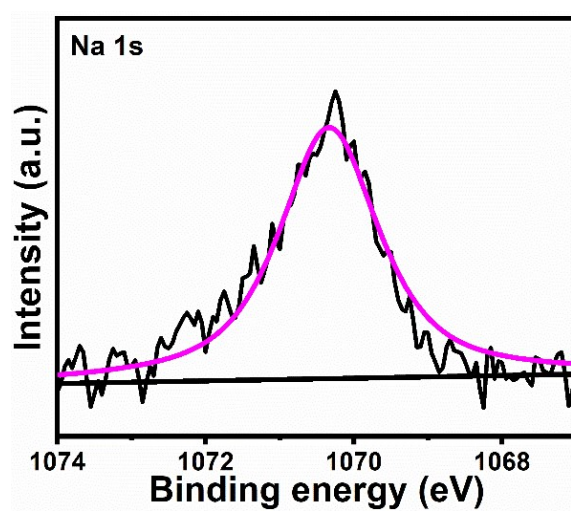

**Fig. S11.** Na 1s spectrum of the S-P-NNO/f-Nb<sub>2</sub>CT<sub>x</sub>.

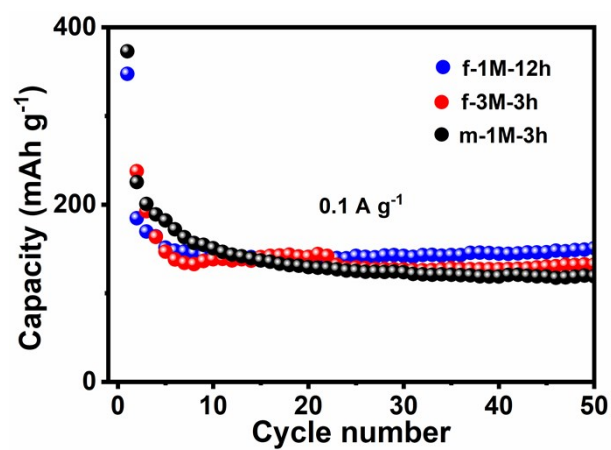

**Fig. S12.** Cycle performance of f-1M-12h, f-3M-3h and m-1M-3h at 0.1 A g<sup>-1</sup>.

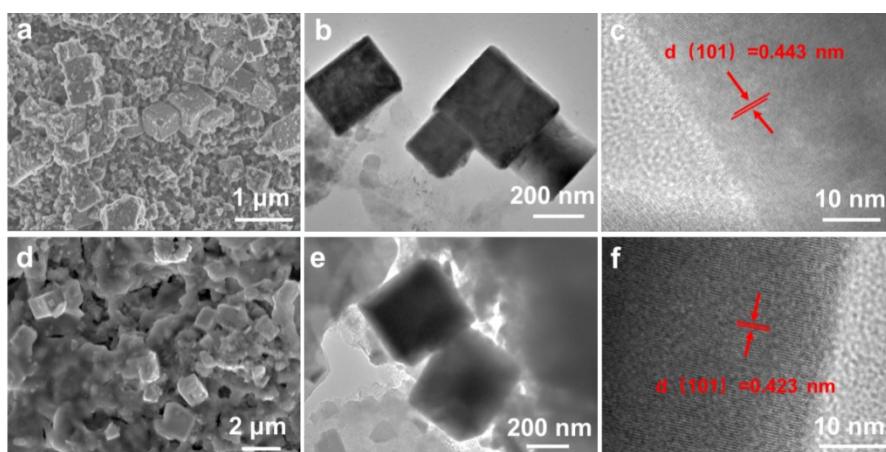

**Fig. S13.** (a) SEM, (b) TEM and (c) HRTEM images of the S-P-NNO after 1500 cycles at  $1.0 \text{ A g}^{-1}$ . (d) SEM, (e) TEM, and (f) HRTEM images of the S-P-NNO/f-Nb<sub>2</sub>CT<sub>x</sub> after 1500 cycles at  $1.0 \text{ A g}^{-1}$ .

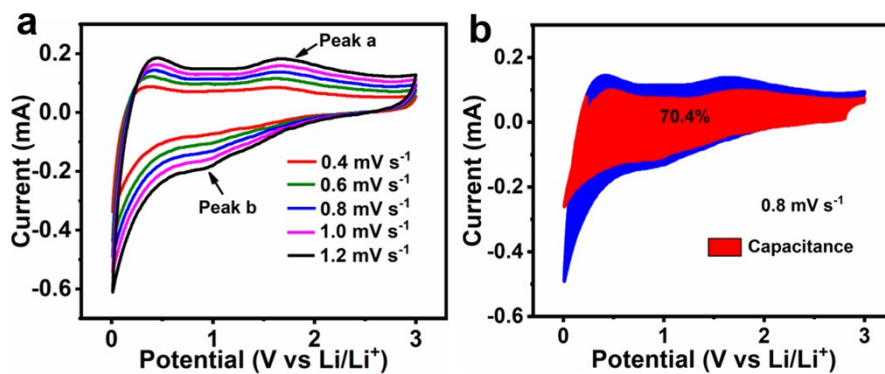

**Fig. S14.** Electrochemical kinetics analysis of the S-P-NNO electrode. (a) CV curves at various scan rates ranging from 0.4 to 1.2  $\text{mV s}^{-1}$ , (b) CV curve with pseudocapacitive (red) and battery-type (blue) contributions at 0.8  $\text{mV s}^{-1}$ .

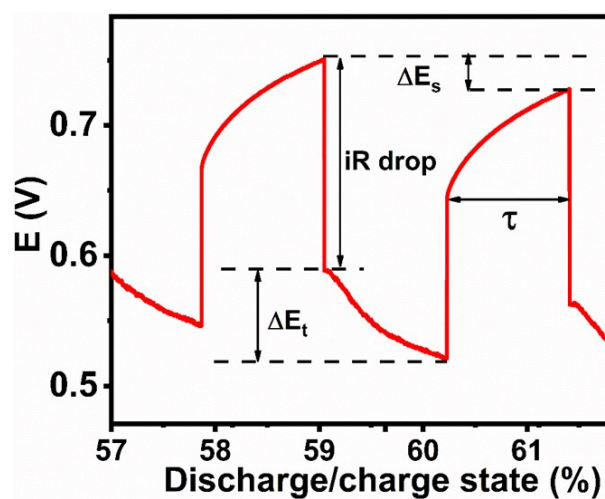

**Fig. S15.** GITT curves of the S-P-NNO/f-Nb<sub>2</sub>CT<sub>x</sub> anode with the  $\Delta E_t$ ,  $\Delta E_s$  and  $\tau$  during discharge and charge processes.



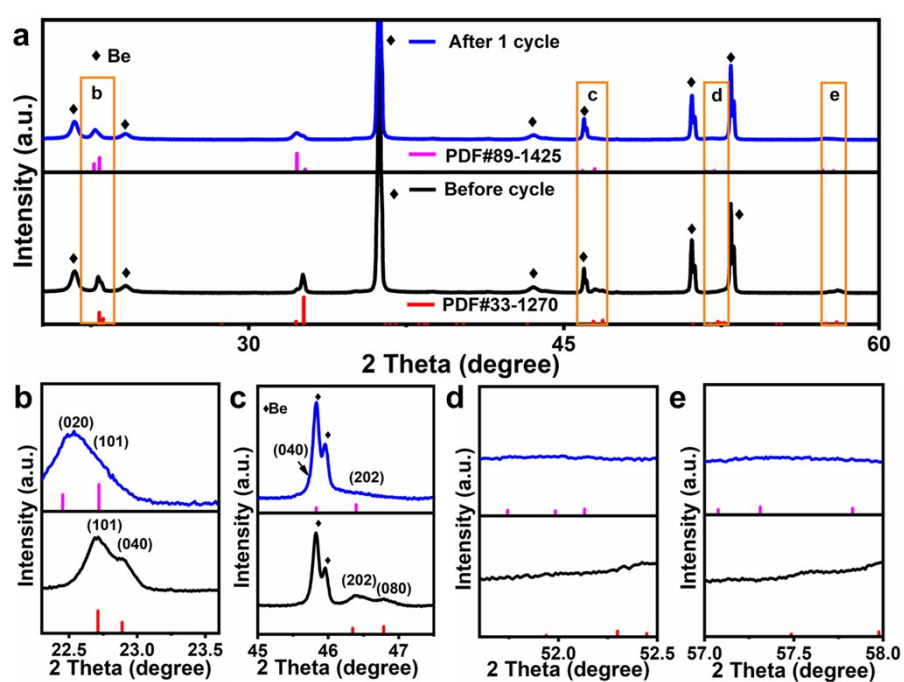

**Fig. S16.** XRD patterns of (a) S-P-NNO and (b – e) corresponding partial enlarged images before and after the 1<sup>st</sup> cycle.

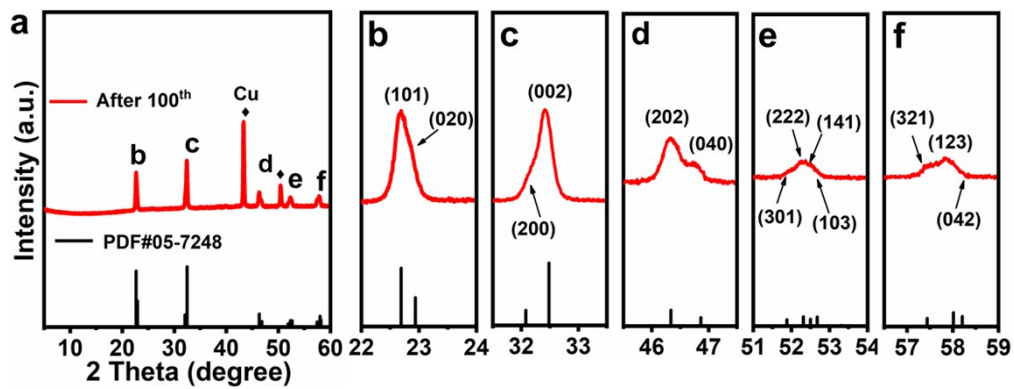

**Fig. S17.** XRD patterns of (a) S-P-NNO and (b – f) corresponding partial enlarged images after the 100<sup>th</sup> cycle.

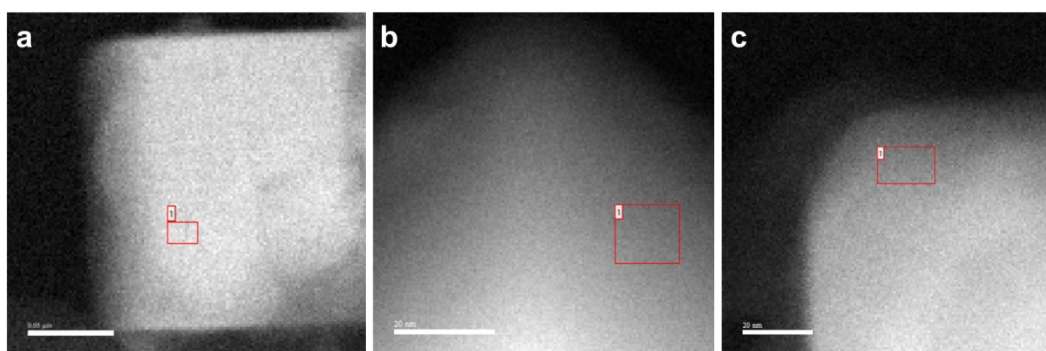

**Fig. S18.** STEM images of the S-P-NNO electrode after (a) the 1<sup>st</sup>, (b) 100<sup>th</sup>, and (c) 500<sup>th</sup> cycles, respectively. The red rectangular regions in panels for EELS tests.

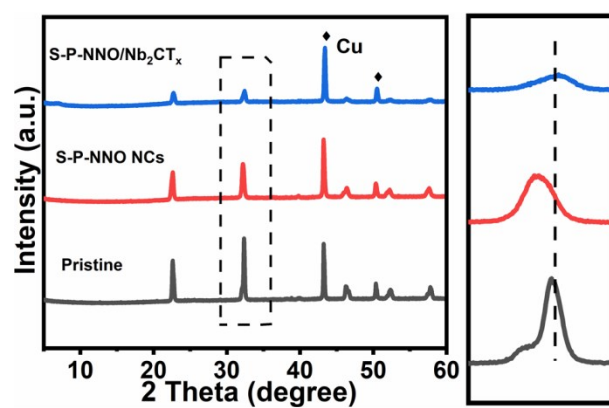

**Fig.S19.** *Ex-situ* XRD patterns of S-P-NNO and S-P-NNO/ f-Nb<sub>2</sub>CT<sub>x</sub> after 1<sup>st</sup> cycle.

**Table S1.** Approximate mass loading of each device

| Electrodes                                     | Mass loading<br>(mg cm <sup>-2</sup> ) | Reference |
|------------------------------------------------|----------------------------------------|-----------|
| S-P-NNO/f-Nb <sub>2</sub> CT <sub>x</sub> //AC | 4.0 – 4.8                              | This work |
| 3S-Nb <sub>2</sub> O <sub>5</sub> -HoMSs//AC   | 3.0 □ – 5.0                            | [1]       |
| N-NbOC//AC                                     | ~1.98                                  | [2]       |
| NRC-40//AC                                     | 4 □ – 4.8                              | [3]       |
| Nb <sub>2</sub> O <sub>5</sub> //MSP-20        | 1.4□ – 4.9                             | [4]       |
| T-Nb <sub>2</sub> O <sub>5</sub> NRs//AC       | 3.5 – 4.2                              | [5]       |

## Experimental supplemental data

*Synthesis of  $\text{KNbO}_3$ :* Typically, 17.7 g of NaOH (Sinopharm Chemical ReagentCo., Ltd) was putted in 40 mL of the  $\text{f-Nb}_2\text{CT}_x$  solution. After stirred for 20 min, the mixture was transferred into a Taylor reactor (50 mL in volume) at 200 °C for 3 h, and naturally cooled to room temperature (RT). The  $\text{KNbO}_3$  power was obtained by centrifugation, and dried at 60 °C for 12 h.

*Synthesis of  $\text{Na}_{0.4}\text{K}_{0.6}\text{NbO}_3$ :* 0.64g of NaOH and 10.6 g of KOH were putted in 40 mL of the  $\text{f-Nb}_2\text{CT}_x$  solution. After stirring for 20 min, the mixture was transferred into a Taylor reactor (50 mL in volume) at 200 °C for 3 h, and naturally cooled to RT. The  $\text{Na}_{0.4}\text{K}_{0.6}\text{NbO}_3$  power was obtained by centrifugation, and dried at 60 °C for 12 h.

*Synthesis of  $\text{Na}_{0.8}\text{K}_{0.2}\text{NbO}_3$ :* 1.28 g of NaOH and 3.54 g of KOH were putted in 40 mL of the  $\text{f-Nb}_2\text{CT}_x$  solution. After stirring for 20 min, the mixture was transferred into a Taylor reactor (50 mL in volume) at 200 °C for 3 h, and naturally cooled to RT. The  $\text{Na}_{0.8}\text{K}_{0.2}\text{NbO}_3$  power was obtained by centrifugation, and dried at 60 °C for 12 h.

## References

- 1 R. Y. Bi, N. Xu, H. Ren, N. L. Yang, Y. G. Sun, A. Cao, R. B. Yu and D. Wang, *Angew. Chem. Int. Ed.* 2020, **59**, 4865.
- 2 S. Hemmati, G. Li, X. L. Wang, Y. L. Ding, Y. Pei, A. P. Yu and Z. W. Chen, *Nano Energy* 2019, **56**, 118.
- 3 C. H. Lai, D. Ashby, M. Moz, Y. Gogotsi, L. Pilon and B. Dunn, *Langmuir* 2017, **33**, 9407.
- 4 E. Lim, H. Kim, C. Jo, J. Chun, K. Ku, S. Kim, H. I. Lee, I. Nam, S. Yoon, K. Kang and J. Lee, *ACS Nano* 2014, **8**, 8968.
- 5 L. Qin, Y. Liu, S. Y. Xu, S. C. Wang, X. Sun, S. H. Zhu, L. R. Hou and C. Z. Yuan, *Small Methods* 2020, **4**, 2000630.
